# Supplementary material for: Construction of core–shell tecto dendrimers based on supramolecular host–guest assembly for enhanced gene delivery
Source: Royal Society of Chemistry journal article supplement (doi:10.1039/c7tb02585h), 2017-01-01
Supplement: c7tb02585h1.pdf [file c7tb02585h1.pdf]

## Electronic Supporting Information

### Construction of Core-shell Tecto Dendrimers Based on Supramolecular Host-Guest Assembly for Enhanced Gene Delivery

Feng Chen,<sup>a</sup> Lingdan Kong,<sup>a</sup> Le Wang,<sup>b</sup> Yu Fan,<sup>a</sup> Mingwu Shen,<sup>a\*</sup> Xiangyang Shi<sup>\*a</sup>

*This article is specially contributed in memoriam of Prof. Dr. Fritz Vögtle (1939–2017), one of the first innovative pioneers of cascade molecules/dendrimers.*

<sup>a</sup> State Key Laboratory for Modification of Chemical Fibers and Polymer Materials, College of Chemistry, Chemical Engineering and Biotechnology, Donghua University, Shanghai 201620, People's Republic of China

<sup>b</sup> College of Chemistry and Chemical Engineering, Shanghai University of Engineering Science, Shanghai 201620, People's Republic of China

E-mail: xshi@dhu.edu.cn (X. Shi) and [mwshen@dhu.edu.cn](mailto:mwshen@dhu.edu.cn) (M. Shen)

**Table S1.** Physicochemical parameters of the formed vectors.

| <b>Vector</b>                                      | <b>G3-Ad</b> | <b>G5-CD</b> | <b>G5-CD/Ad-G3</b> |
|----------------------------------------------------|--------------|--------------|--------------------|
| <b>Mw<sup>a</sup></b>                              | 7139.1       | 35669.8      | 79231.3            |
| <b>Mean number of primary amines per dendrimer</b> | 26           | 64           | 83                 |

<sup>a</sup> Molecular weights were estimated by <sup>1</sup>H NMR spectra.

**Table S2.** Polydispersity index (PDI) data of the vectors (N/P = 0) and vector/pDNA polyplexes under different N/P ratios.

| <b>N/P</b> | <b>G3-Ad</b> | <b>G5-CD</b> | <b>G5-CD/Ad-G3</b> |
|------------|--------------|--------------|--------------------|
| 0          | 0.39±0.02    | 0.41±0.03    | 0.32±0.04          |
| 1          | 0.18±0.07    | 0.45±0.06    | 0.54±0.03          |
| 5          | 0.42±0.05    | 0.36±0.04    | 0.21±0.01          |
| 10         | 0.23±0.03    | 0.63±0.07    | 0.32±0.07          |
| 20         | 0.35±0.03    | 0.29±0.06    | 0.38±0.03          |
| 40         | 0.42±0.06    | 0.44±0.06    | 0.36±0.01          |
| 60         | 0.54±0.03    | 0.62±0.09    | 0.24±0.05          |

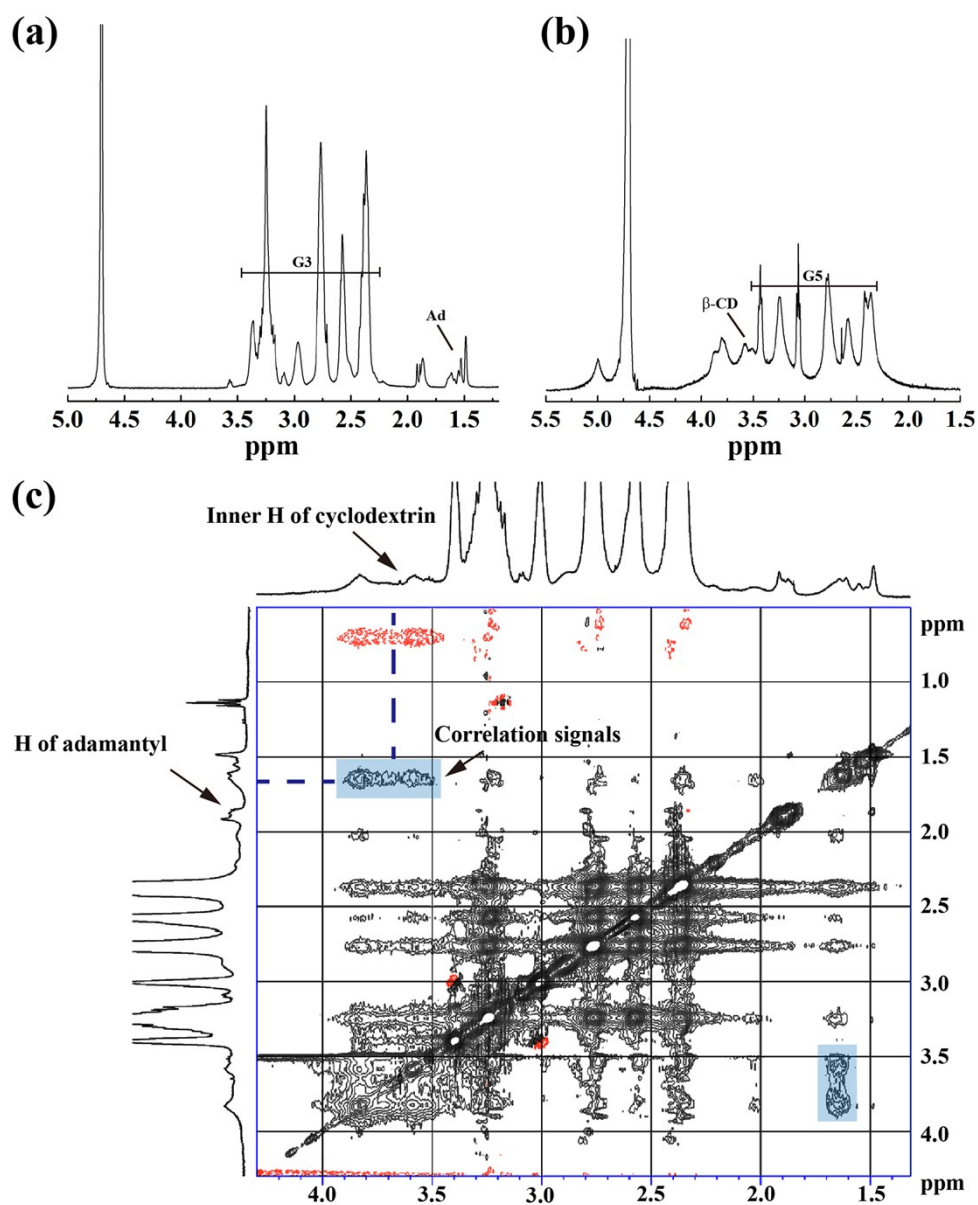

**Figure S1.**  $^1\text{H}$  NMR spectrum of G3-Ad (a) and G5-CD (b) dendrimers in  $\text{D}_2\text{O}$ . 2D NOESY  $^1\text{H}$  NMR spectrum of G5-CD/Ad-G3 dendrimers is shown in (c).

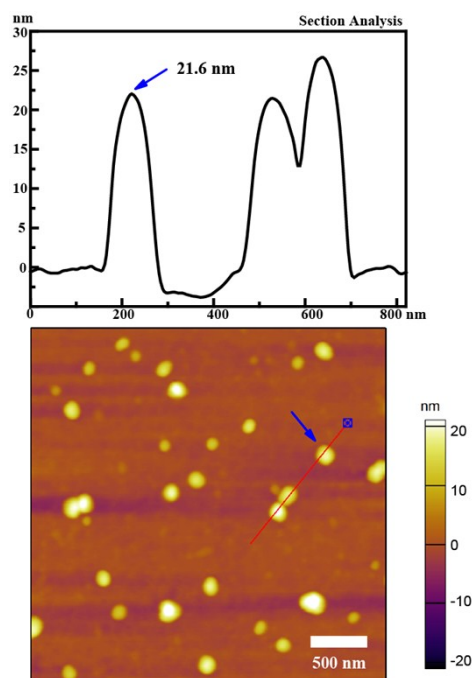

**Figure S2.** AFM image of G5-CD/Ad-G3/pDNA polyplexes at the N/P ratio of 60:1.

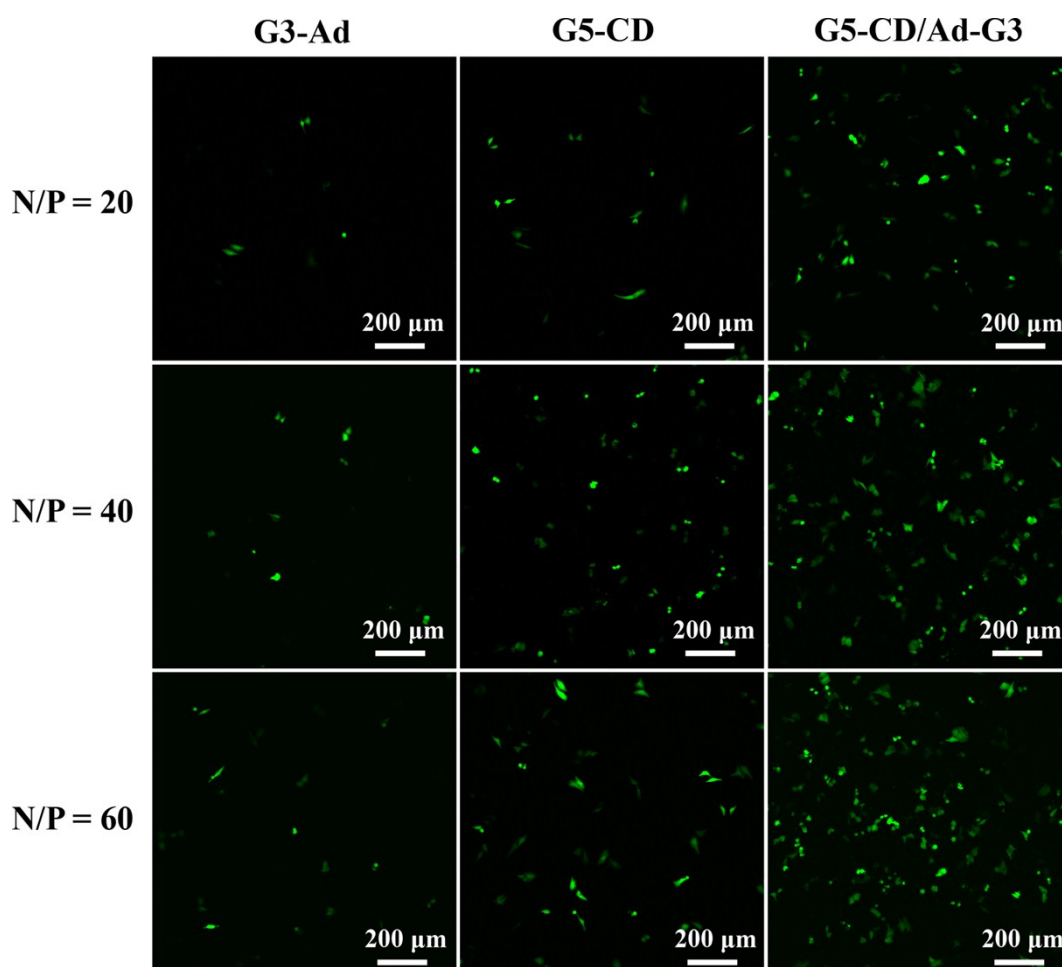

**Figure S3.** Confocal microscopic images of HeLa cells transfected with different vector/EGFP pDNA polyplexes at different N/P ratios (20:1, 40:1, and 60:1 respectively) for 24 h. Transfection was performed at a dose of 1  $\mu$ g/well of pDNA. EGFP plasmid DNA expression in HeLa cells was observed in green fluorescence.

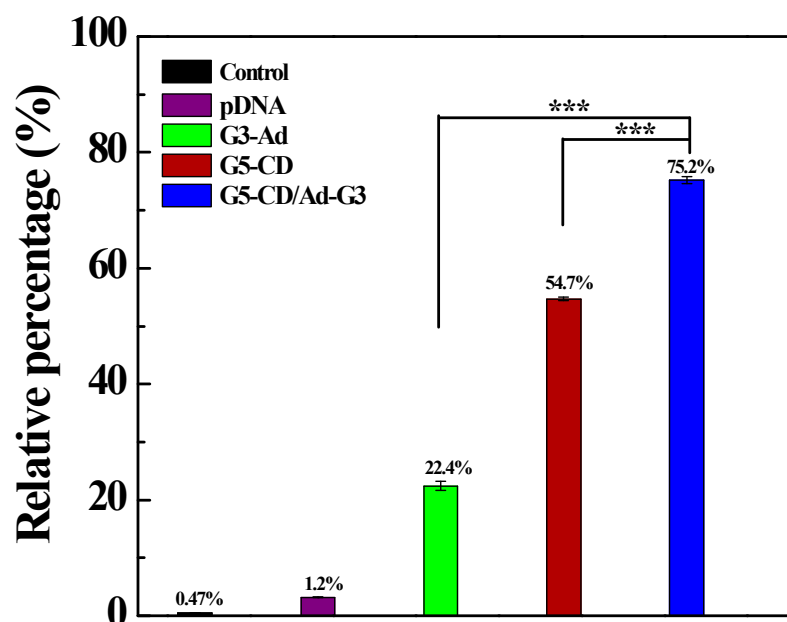

**Figure S4.** Flow cytometry analysis of the intracellular uptake of vector/Cy3-labeled pDNA polyplexes (1  $\mu$ g of Cy3-labeled pDNA per well) at an N/P ratio of 60:1 for 4 h. G3-Ad, G5-CD and G5-CD/Ad-G3 dendrimers were used as vectors. The cells without treatment or treated with naked pDNA were used as control.
